# Supplementary material for: The Glucocorticoid Receptor Regulates the ANGPTL4 Gene in a CTCF-Mediated Chromatin Context in Human Hepatic Cells
Source: PubMed Central journal article supplement (PMC5215901; doi:10.1371/journal.pone.0169225), 2017-01-05
Supplement: pone.0169225.s007.pdf [file pone.0169225.s007.pdf]

## S1 Table. Primers used in this study.

### Real time PCR primers

|                     |                                 |
|---------------------|---------------------------------|
| ANGPTL4 Forward     | 5'-GAGGTCCTTCACAGCCTGCA-3'      |
| ANGPTL4 Reverse     | 5'-TGGGCCACCTTGTGGAAGAG-3'      |
| KANK3 Forward       | 5'-CCTGCACTACAGTGTGTCCC-3'      |
| KANK3 Reverse       | 5'-CTCACAGAGGTGAGTGCAGC-3'      |
| RAB11B Forward      | 5'-GGACGACGAGTACGACTACC-3'      |
| RAB11B Reverse      | 5'-TGCTCTCCAGGTTGAACTCG-3'      |
| RAB11B AS Forward   | 5'-CTTCAAGAATGAAGCCATGG-3'      |
| RAB11B AS Reverse   | 5'-TGAGGTCAGCAGTTCGAGAC-3'      |
| CTCF Forward        | 5'-CTTTGCAGCCACGGAGAG-3'        |
| CTCF Reverse        | 5'-TCTCCTTTCTTTAATAAAAGTTTCG-3' |
| GR $\alpha$ Forward | 5'-AAGGAAACTCCAGCCAGAAC-3'      |
| GR $\alpha$ Reverse | 5'-CGGGGAATTCAATACTCATGG-3'     |
| FKBP5 Forward       | 5'-GAGCAGGGAGAGGATATTACC-3'     |
| FKBP5 Reverse       | 5'-CTTTGTCTCCAATCATCGGC-3'      |
| 36B4 Forward        | 5'-GATGCCCAGGGAAGACAG-3'        |
| 36B4 Reverse        | 5'-TCTGCTCCCACAATGAAACAT-3'     |

### ChIP-qPCR primers

|                          |                                |
|--------------------------|--------------------------------|
| AC1 Forward              | 5'-TTGGGTAATGAGGAGGCGGGT-3'    |
| AC1 Reverse              | 5'-TCTTGGTCCTTGGGGATGGC-3'     |
| AC2 Forward              | 5'-TCTGAGCGGCCAGAACAGCT-3'     |
| AC2 Reverse              | 5'-TGTATATACCCGTTTGACAACCGC-3' |
| AC3 Forward              | 5'-TGGGTTCGAGAGCGCCCTCAT-3'    |
| AC3 Reverse              | 5'-AGAACTCTGTGAGCTCCGCC-3'     |
| AC4 Forward              | 5'-GGTTGTCTGCAGAGGAGGGA-3'     |
| AC4 Reverse              | 5'-CGCTCATCACCAACCAAAACGC-3'   |
| AG1 Forward              | 5'-AGACTGTGGTTAGTTGCTGG-3'     |
| AG1 Reverse              | 5'-GGATTCTTCTCAGACAAGCCC-3'    |
| AG2 Forward              | 5'-CTTGAATAAAAGCAACCTC-3'      |
| AG2 Reverse              | 5'-GGGTAACCTACTAGATCTGTG-3'    |
| ANGPTL4 promoter Forward | 5'-CAAGACTCCTCCGCCCACTC-3'     |
| ANGPTL4 promoter Reverse | 5'-CGGATCACAGTCGTGTGAGGA-3'    |
| Negative control Forward | 5'-AGAGGTCAAGTCTCTGCCAG-3'     |
| Negative control Reverse | 5'-AGAAATCCCACCGGGTTACTC-3'    |

### 3C primers

- 1 5'-AGACGGAGTCTGGCTCTGTCC-3'
- 1.1 5'-AGGTCCCTGACCTCTCCCTTC-3'
- 2 5'-CCCAGGCTGGAGTGCAGTGGC-3'
- 2.1 5'-TTGCTCAGGCTGGAGTGCGAT-3'
- 3 5'-TCTGGTGGTGA ACTCGAGAGCAGC-3'
- 4 5'-GTCACACAGCTCAGAAGGGTC-3'
- 5 5'-GAATGTGGCCTCTTACCCAGC-3'
- 6 5'-AATTATGAGTGCCTTAGCGGC-3'
- 7 5'-GTAAGACCCGCTTGGTTGCAG-3'
- 8 5'-GCAAGGAGTGAAGCTCCATGC-3'
- 9 5'-CAGTGACAGTGGGCTCAGAGG-3'
- 9.1 5'-TTCCCAGGGTGTT CATTGGGC-3'
- 10 5'-AGGTAGTCGTA CTCTCGTCC-3'
- 11 5'-TTCCCCAACACGCCAGGTGC-3'
- 12 5'-GAGAGACAGATGTACCTGAGG-3'
